# Supplementary material
Source: PubMed Central journal article supplement (PMC2714384)

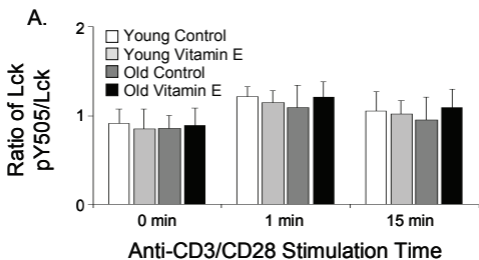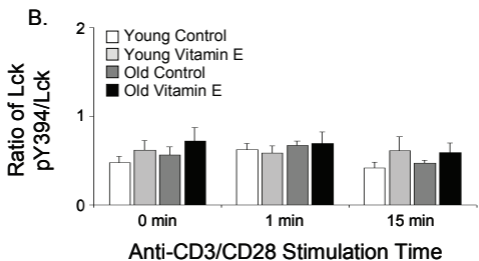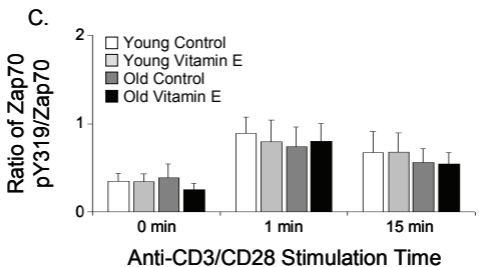

Supplement: jn.108.103416_1.pdf [file jn.108.103416_1.pdf]
